# Supplementary material for: Improving the Efficiency of Electrocatalysis of Cytochrome P450 3A4 by Modifying the Electrode with Membrane Protein Streptolysin O for Studying the Metabolic Transformations of Drugs
Source: MDPI journal article supplement (doi:10.3390/bios13040457), 2023-04-04
Supplement: s1 [file s1]

## Supplemental information

### Improving the Efficiency of Electrocatalysis of Cytochrome P450 3A4 by Modifying the Electrode with Membrane Protein Streptolysin O for Studying the Metabolic Transformations of Drugs

Polina I. Koroleva<sup>1</sup>, Andrei A. Gilep<sup>1,2</sup>, Sergey V. Kraevsky<sup>1</sup>, Tatiana V. Tsybruk<sup>2</sup>, Victoria V. Shumyantseva<sup>1,3\*</sup>

<sup>1</sup> Institute of Biomedical Chemistry, Pogodinskaya Street, 10, Build 8, 119121 Moscow, Russia; 11126699@mail.ru (P.I.K.); andrei.gilep@gmail.com (A.A.G.); skraevsky@mail.ru (S.V.K)

<sup>2</sup> Institute of Bioorganic Chemistry of the National Academy of Sciences of Belarus, 220141 Minsk, Bela-rus; tvshkel@gmail.com (T.V.T)

<sup>3</sup> Faculty of Biomedicine, Pirogov Russian National Research Medical University, Ostrovitianov Street, 1, 117997 Moscow, Russia

\* Correspondence: viktoria.shumyantseva@ibmc.msk.ru

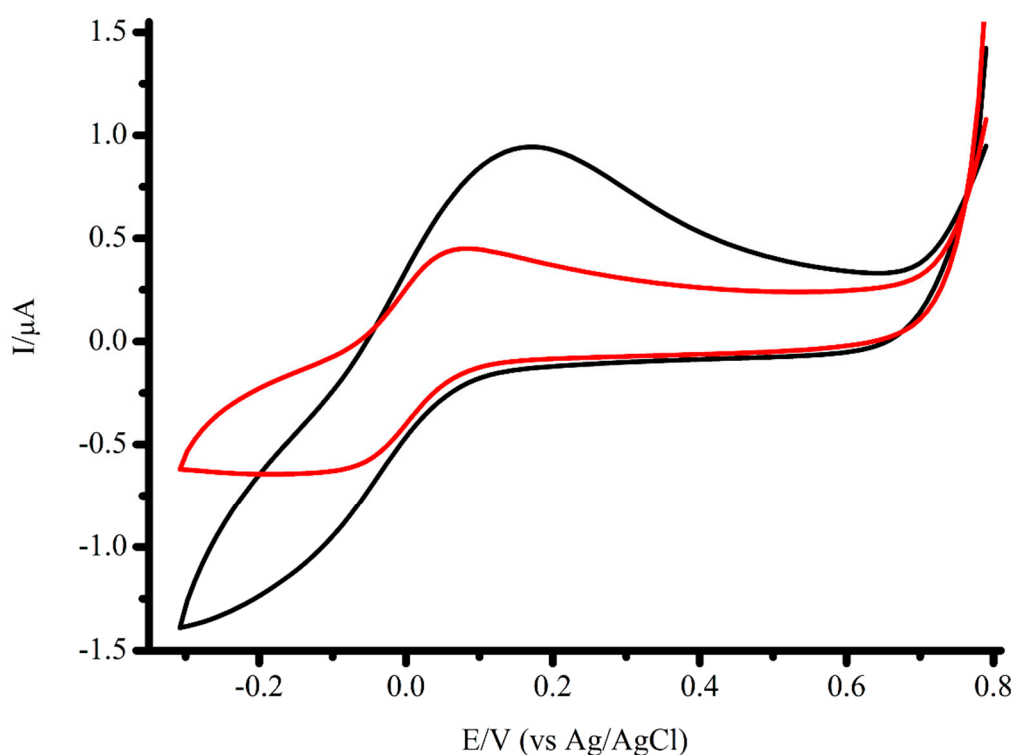

Figure S1. Cyclic voltammograms of 5 mM of  $K_3[Fe(CN)_6]$  on SPE/DDAB (black line) and SPE/DDAB/SLO (red line). The measurements were carried out in 5 mM of  $K_3[Fe(CN)_6]$  at ambient temperature in potential range from -0.3 mV to +0.8 V (vs Ag/AgCl) at scan rates of 0.05 V/s.

Table S1. Electrochemical parameters of SPE/DDAB and SPE/DDAB/SLO in electroactive redox probe 5 mM  $K_3[Fe(CN)_6]/K_4[Fe(CN)_6]$ .

|                                                             | Electrode          |                    |
|-------------------------------------------------------------|--------------------|--------------------|
|                                                             | SPE/DDAB           | SPE/DDAB/SLO       |
| $E_{Red}, V$                                                | $-0.136 \pm 0.011$ | $-0.078 \pm 0.008$ |
| $E_{Ox}, V$                                                 | $0.108 \pm 0.006$  | $0.045 \pm 0.01$   |
| $\Delta E, V$                                               | $0.245 \pm 0.016$  | $0.123 \pm 0.008$  |
| $E_{1/2}, V$ (vs Ag/AgCl)                                   | $-0.014 \pm 0.003$ | $-0.016 \pm 0.008$ |
| $I_{Red}, A \times 10^{-7}$                                 | $-2 \pm 0.7$       | $-1.3 \pm 0.4$     |
| $I_{Ox}, A \times 10^{-7}$                                  | $5.5 \pm 0.41$     | $1.2 \pm 0.5$      |
| <b>Electroactive surface area,<br/><math>A, cm^2</math></b> | 0.000092           | 0.00011            |

Table S2. Comparison of the Michaelis constants  $K_M$  of erythromycin for CYP3A4 in electrochemical and microsomal systems.

| System                                 | $K_M, M$                     | Reference |
|----------------------------------------|------------------------------|-----------|
| GC/PDDA/CYP3A4                         | $86 \pm 3 \times 10^{-6}$    | [34]      |
| SPE/DDAB/ CYP3A4                       | $3.4 \pm 0.3 \times 10^{-6}$ | [33]      |
| SPE/DDAB/CYP3A4                        | $89.8 \pm 12 \times 10^{-6}$ | This work |
| HLM CYP3A4<br>(Human liver microsomes) | $88 \times 10^{-6}$          | [54]      |
| Expressed CYP3A4                       | $33 \times 10^{-6}$          | [54]      |
